# Supplementary material for: The Hsp90 isoforms from S. cerevisiae differ in structure, function and client range
Source: Springer Nature journal article supplement (doi:10.1038/s41467-019-11518-w), 2019-08-09
Supplement: MOESM1 [file 41467_2019_11518_MOESM1_ESM.pdf › 41467_2019_11518_MOESM1_ESM.pdf]

## Supplementary Information

The Hsp90 isoforms from *S. cerevisiae* differ in structure, function and client range

Hannah Girstmair, Franziska Toppel, *et al.*

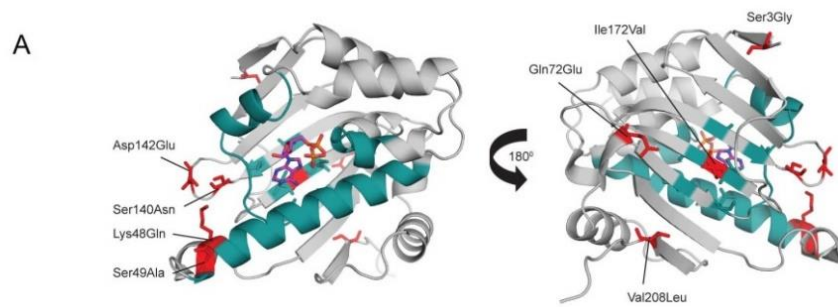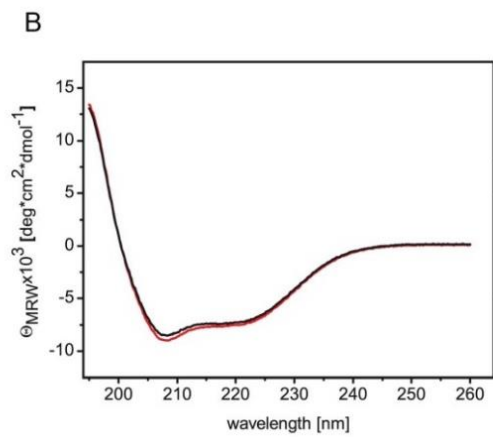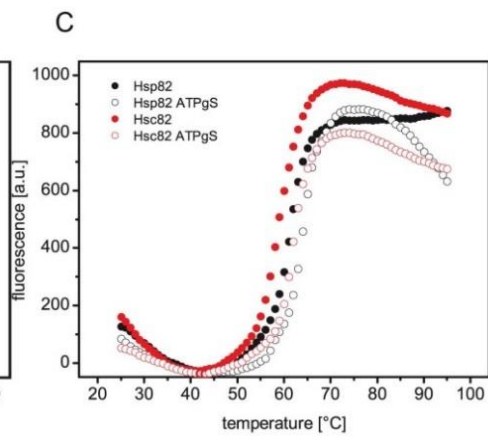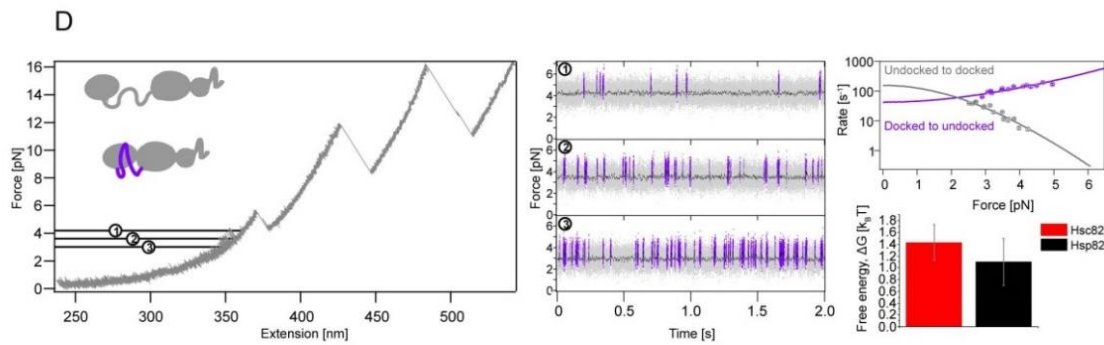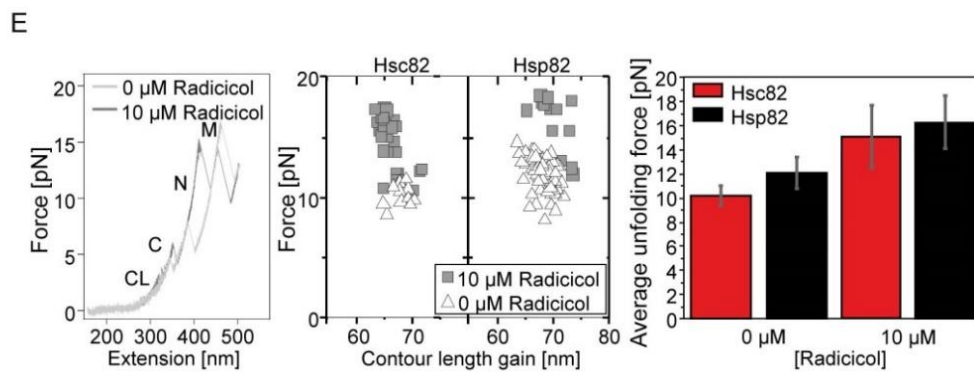

**Supplementary Fig. 1: Structure and stability of the isoforms.** **A:** Cartoon showing the NTD of Hsp82 with sequence differences between Hsp82 and Hsc82 highlighted (PDB entry 1AM1, <sup>1</sup>). Residues forming the ATP-binding pocket are colored in teal, while changed residues are shown as red sticks. **B:** Far-UV circular dichroism analysis of the two Hsp90 isoforms. **C:** Thermal shift assay with the two Hsp90 isoforms. **D:** The charged linker of Hsc82 compared with that of Hsp82. **Left panel:** A single unfolding trace of Hsc82 pulled at 20nm/s, showing the flipping of the charged linker followed by the unfolding of the CTD, NTD and MD. The inset shows a schematic illustration of the undocked (grey) and docked (purple) states of the charged linker. **Centre:** Performing equilibrium measurements at a constant distance at points (1), (2) and (3) illustrated on the left-hand side, shows the impact of increasing bead separation on the measured forces and kinetics of the docked (purple) and undocked (grey) states of the charged linker. At an increased bead separation, a higher force is applied across the molecule, and the charged linker is less likely to be found in the docked state. This is clearly illustrated on the right-hand side. **Upper right panel:** Transition rates between states vs. force for a single molecule of Hsc82. As force increases, the rate of going from the undocked state to the docked state decreases. **Lower right panel:** A comparison of the calculated stabilization free energy values for the charged linkers of Hsp82 ( $1.1 \text{ k}_B\text{T} \pm 0.4$ , measured from 34 molecules, error is SD between measurements) and of Hsc82 ( $1.43 \text{ k}_B\text{T} \pm 0.3$ , measured from 5 molecules, error is SD between measurements). **E:** The impact of RD on the NTD stabilities of Hsp82 and Hsc82. **Left panel:** A single unfolding trace of Hsc82 pulled at 20nm/s without (light grey) and with (dark grey) 10  $\mu\text{M}$  of RD. The flipping of the charged linker (CL) and unfolding of the CTD (C), NTD (N) and MD (M) are annotated. The NTD is significantly stabilized by the presence of RD. **Centre:** Scatter plots of unfolding force vs. contour length gain at a 20nm/s pulling velocity for the NTDs of Hsp82 (left) and Hsc82 (right), showing unfolding events without RD (white triangles) and with 10  $\mu\text{M}$  of RD (dark grey squares). **Right panel:** Average unfolding forces with and without RD from the scatter plot in the central panel, illustrating the impact that RD has in stabilizing the NTDs of both isoforms.

A

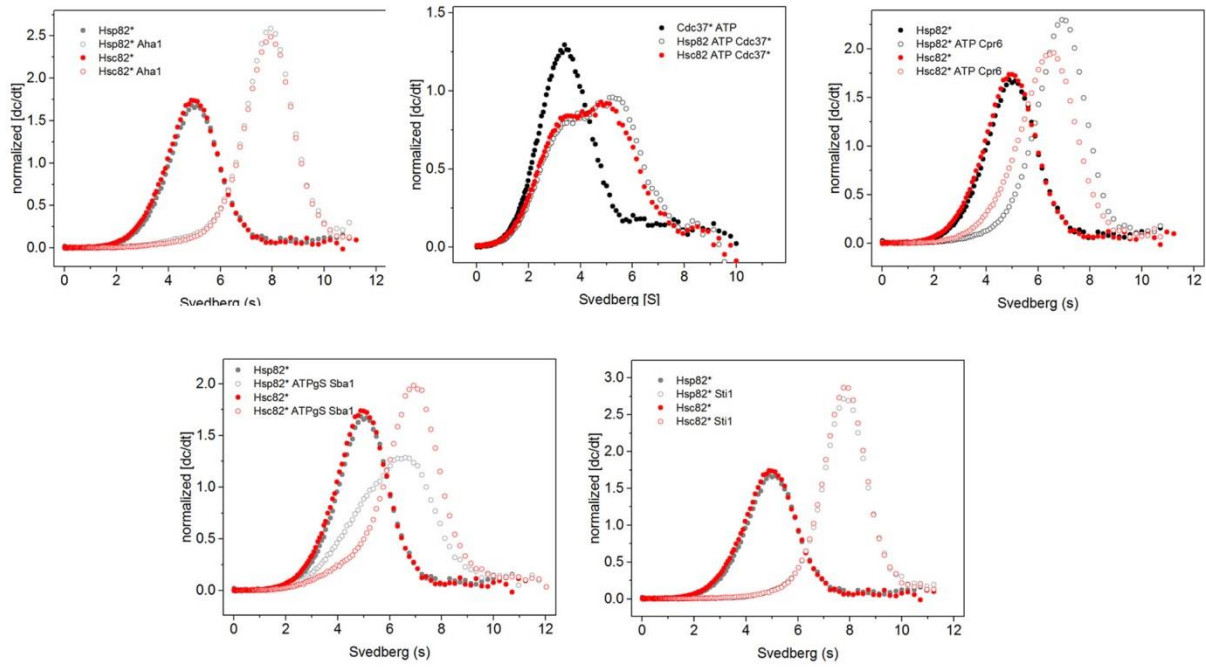

**Supplementary Fig. 2: Chaperone binding and growth of the isoforms. A:** Complex formation between the Hsp90 isoforms and co-chaperones determined by analytical ultracentrifugation. Normalized sedimentation profiles (dc/dt) of the Hsp90 isoforms in the presence of: Aha1, Cdc37/ATP, Cpr6/ATP, p23/Sba1/ATP $\gamma$ S and Sti1. All experiments except the one with Cdc37 were performed with Hsp90 isoforms that were labelled with ATTO 488. The Cdc37 experiment was performed with Cdc37 labelled with ATTO 488, since no binding to Cdc37 was detected when labelled Hsp90 isoforms were used.

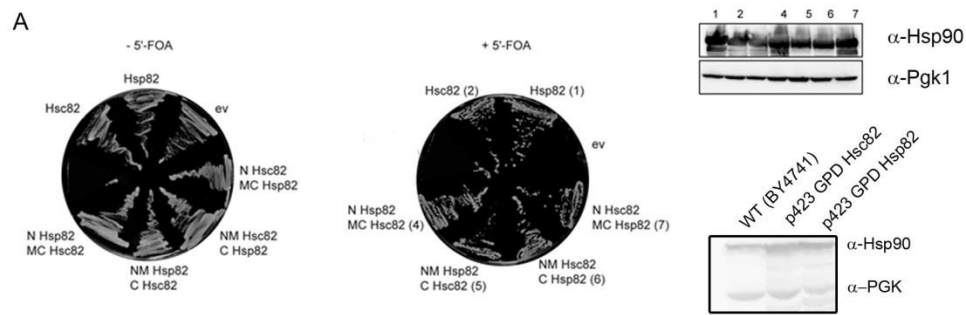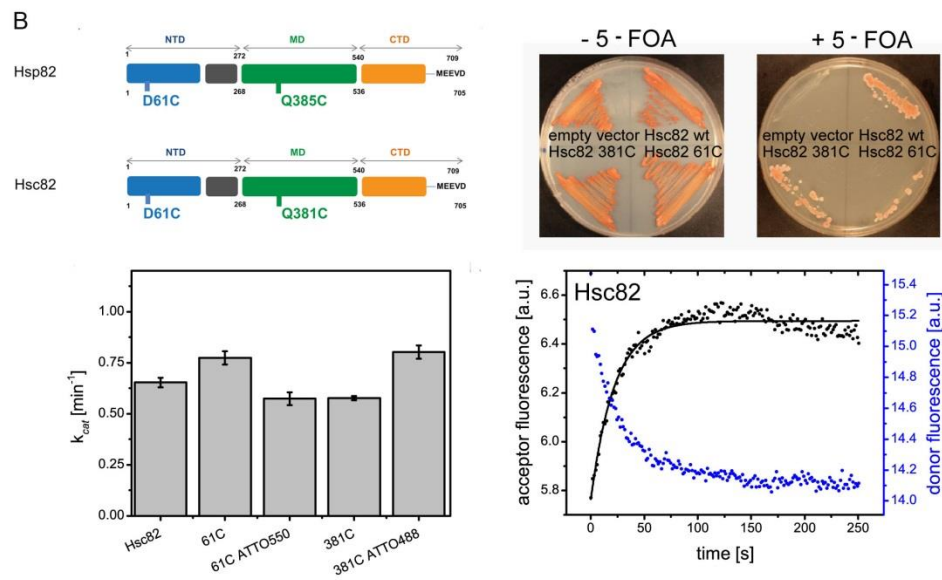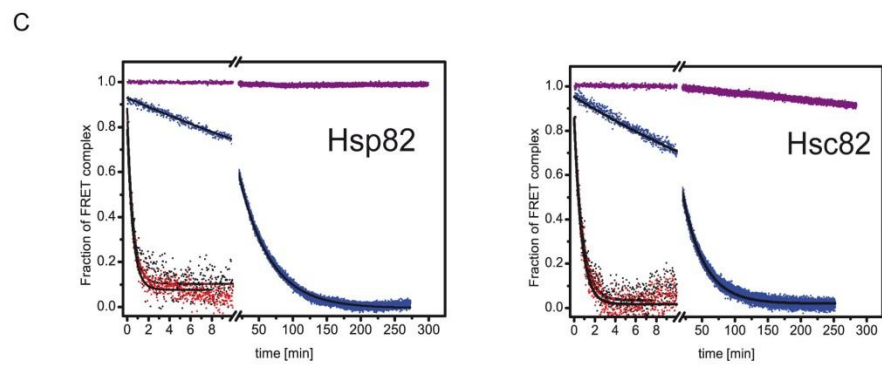

**Supplementary Fig. 3: Growth and FRET control experiments.** **A:** **Left panel:** Viability analysis and expression level of the different Hsp90 isoform constructs. Viability was tested by a 5-FOA plasmid shuffling approach. ev: control experiment with an empty vector. **Upper right panel:** Expression level of the respective constructs was monitored by a Western Blot. The enumeration of the constructs in the viability assay (left side) and the Western blot is identical.  $\alpha$ -Pgk1 was used for the loading control. **Lower right panel:** Comparison of the expression levels of the overexpressed isoforms at 30 °C (Hsp82 and Hs82 expressed from a pGPD 423 vector) with the WT (total Hsp90 level in a BY 4741 strain, which was used for all *in vivo* experiments) **B:** FRET control experiments. **Upper left panel:** Scheme depicting the cysteine mutants used to perform FRET experiments with Hsp82 and Hsc82. Residues that are changed to cysteines (used for labelling the proteins with ATTO 488) are indicated. **Upper right panel:** Viability of Hsc82 C61 and Hsc82 C381 was tested by a 5-FOA plasmid shuffling approach. **Lower left panel:** ATPase activities of Hsc82 cysteine mutants with and without ATTO dyes compared to wild-type Hsc82. Means and standard deviations were calculated from at least three technical replicates. All values were corrected for background activity by inhibiting the ATPase with RD. **Lower right panel:** Dimer-formation of donor- and acceptor-labeled Hsc82 followed by FRET. **C:** The stability of the closed states of Hsp82 and Hsc82 was investigated by a FRET chase experiment. The chase was induced by adding a 10-fold excess of unlabeled protein (Hsp82 or Hsc82) to a preformed FRET-complex (of Hsp82 or Hsc82) in the absence of nucleotide (black), in the presence of 2 mM ATP (red), 2 mM ATP $\gamma$ S (blue) or 2 mM AMP-PNP (purple).

A

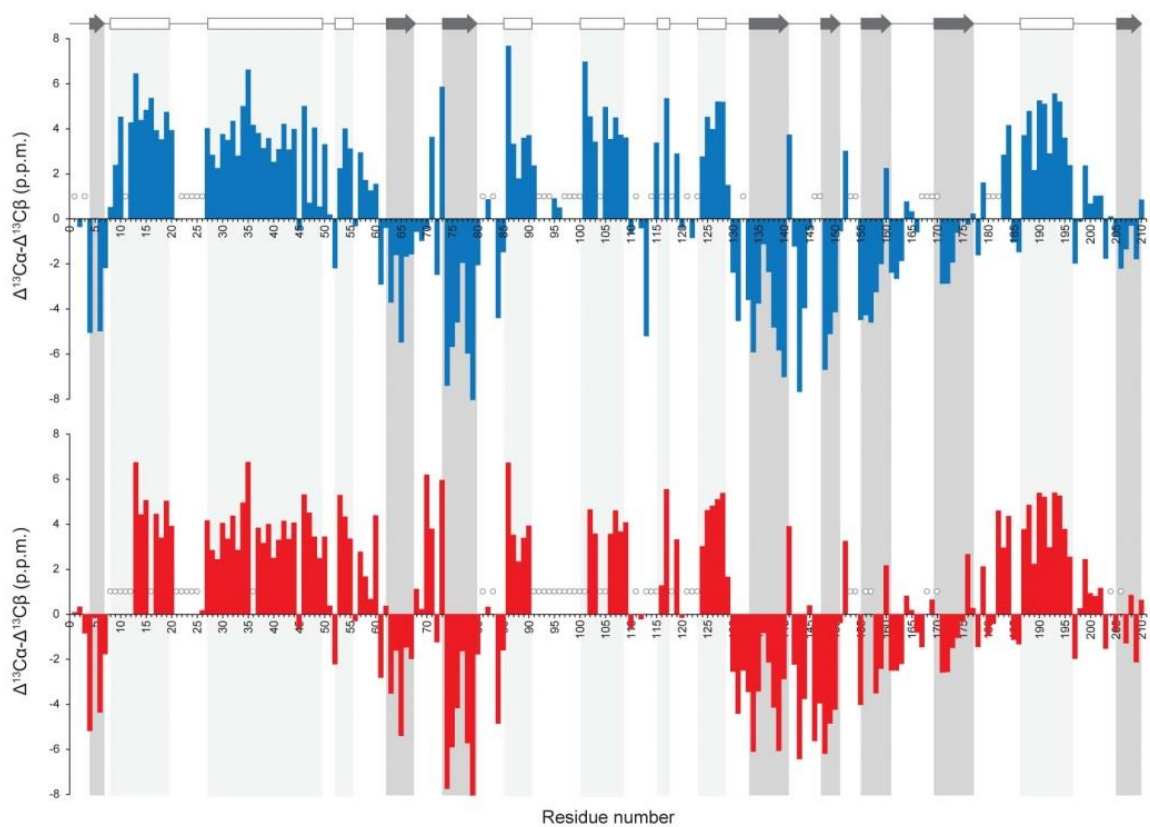

B

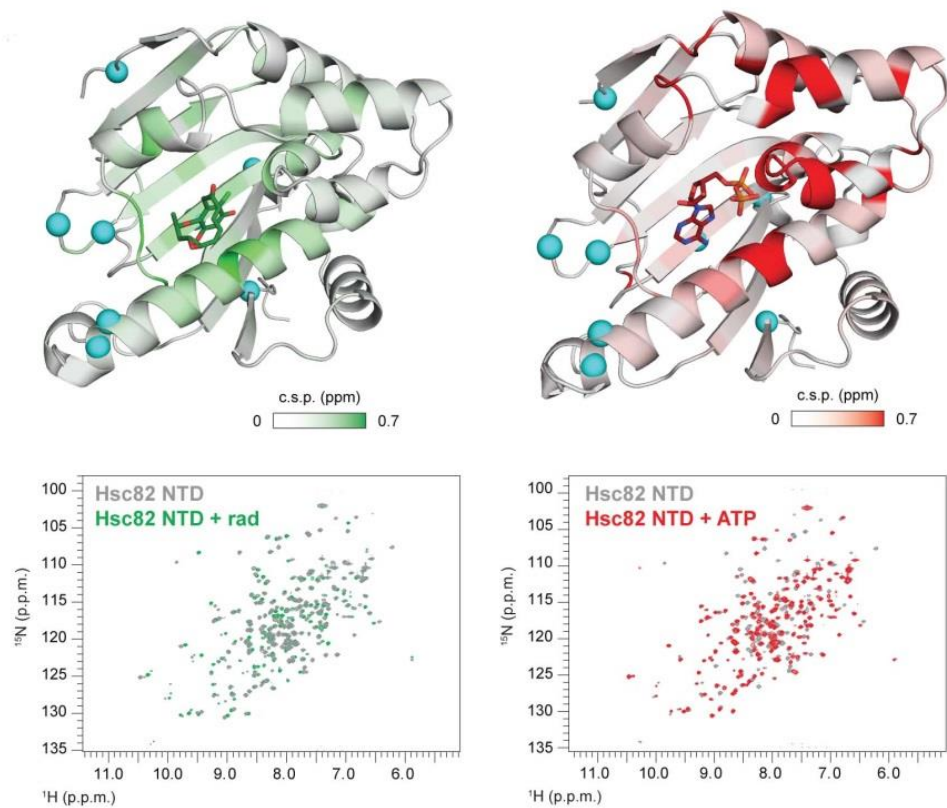

**Supplementary Fig. 4: NMR analysis of Hsp82 and Hsc82. A:**  $^{13}\text{C}$  secondary chemical shifts of Hsc82 NTD (blue) and Hsp82 (red) as a function of the residue number. No significant differences between the secondary structures of the two isoforms are seen. Secondary chemical shifts were calculated for each residue as the difference between the experimental  $^{13}\text{C}$  shift and its random coil shift using CcpNmr Analysis<sup>2</sup>: positive values indicate  $\alpha$ -helical conformation, negative  $\beta$ -strand and zero values unstructured regions. Structural elements extracted from TALOS+ software<sup>3</sup> are shown on top of each plot: arrows represent  $\beta$ -strands, rectangles  $\alpha$ -helices. Empty dots indicate residues without data. **B:** Effects of RD and ATP binding to the NTDs of Hsp82/Hsc82 analyzed by NMR spectroscopy. Left panel: mapping of NMR chemical shift perturbation (CSP) of Hsc82 NTD upon RD binding onto the crystal structure of Hsp82 NTD bound to RD (PDB id 1BGQ<sup>4</sup>). Right panel: mapping of CSPs of Hsc82 NTD upon ATP binding onto the crystal structure of Hsp82 NTD bound to ATP (PDB id 1AM1<sup>5</sup>). In both cases, ligands are shown by sticks colored in dark green or red (for RD or ATP respectively) and changed residues are represented by cyan spheres. The overlay of the  $^1\text{H}$ - $^{15}\text{N}$  HSQC spectra corresponding to the apo- and bound-forms are shown at the bottom.

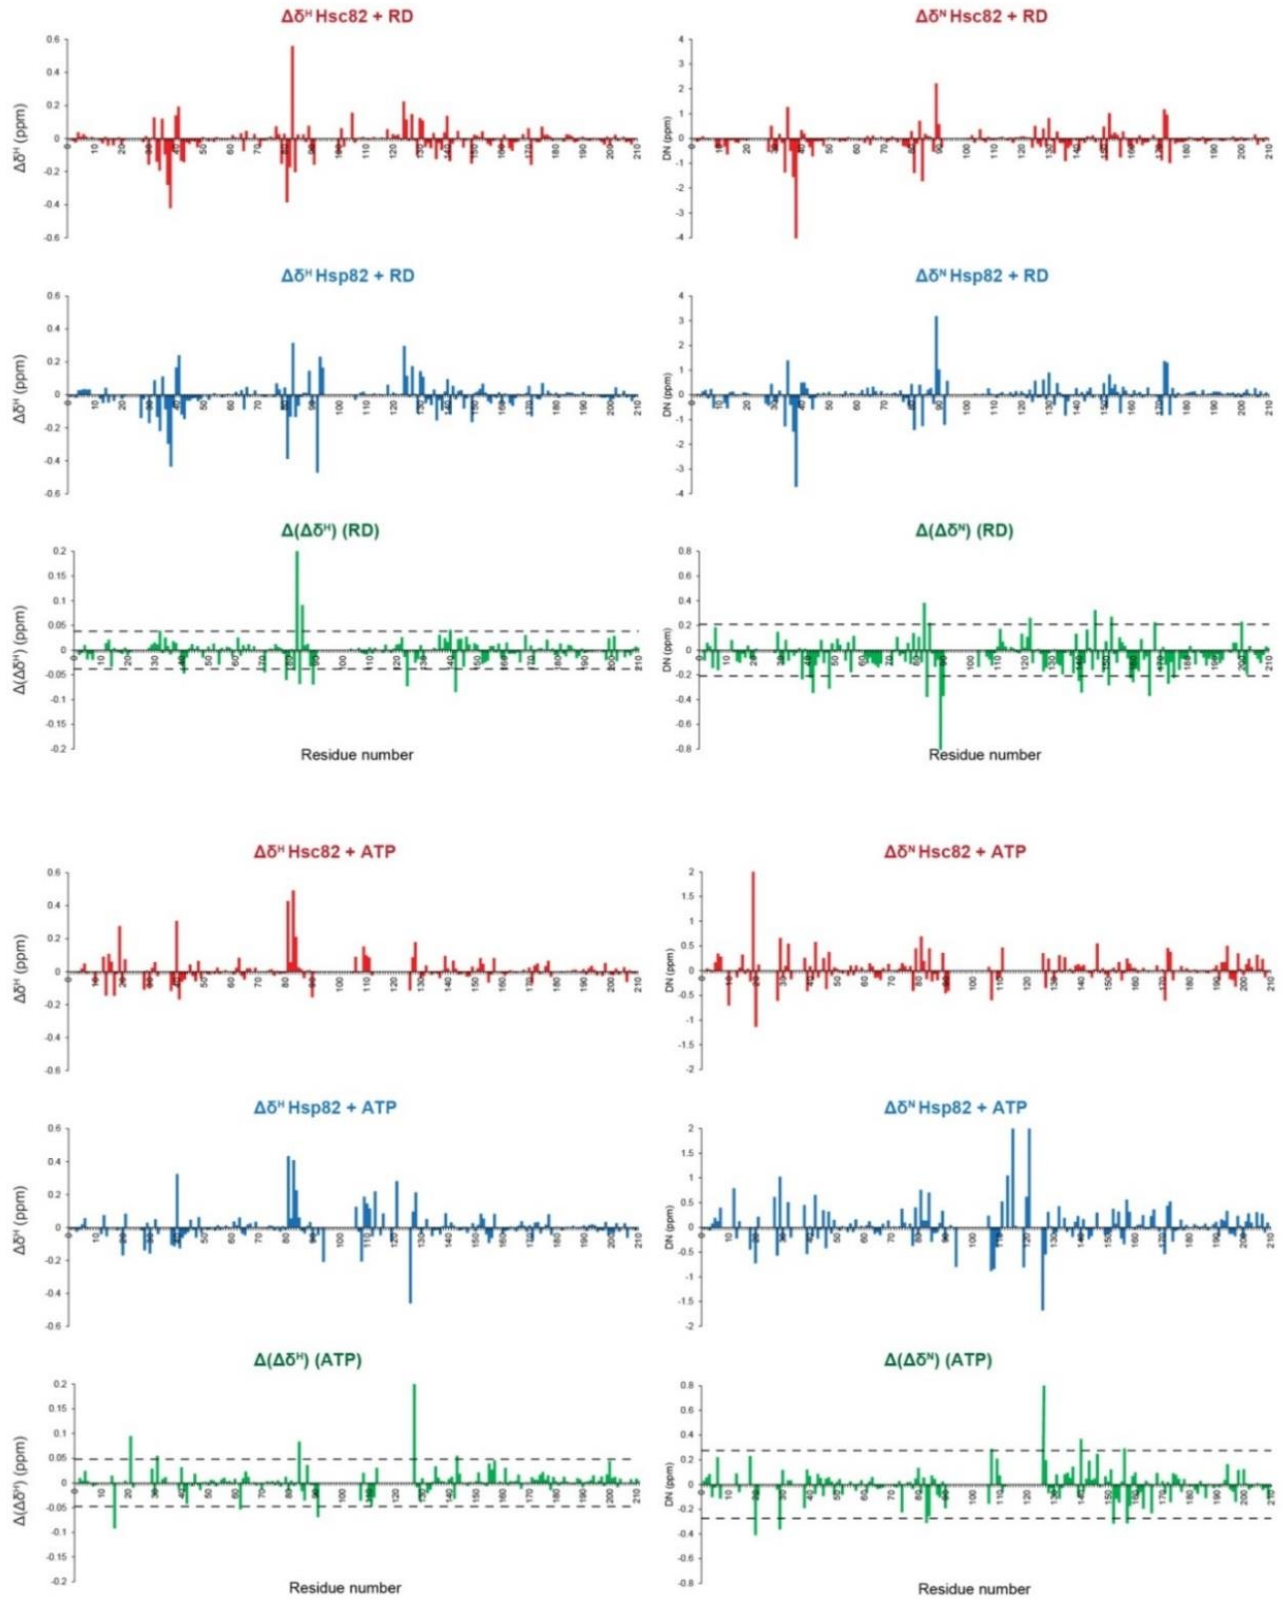

**Supplementary Fig. 5: NMR data in presence RD and ATP.** Differences in the  $^1\text{H}$  and  $^{15}\text{N}$  chemical shifts ( $\Delta\delta^X = \delta^{X, \text{BOUND}} - \delta^{X, \text{APO}}$ ) upon binding of RD (upper panel) or ATP (lower panel), for Hsc82 (red) and Hsp82 (blue). The differential values,  $\Delta(\Delta\delta^X) = \Delta\delta^{X, \text{HSC82}} - \Delta\delta^{X, \text{HSP82}}$ , are plotted below as a function of the residue number (green). The residues for which  $\Delta(\Delta\delta^X)$  is above the mean + standard deviation (dotted line) are assumed to differ significantly between isoforms upon RD/ATP binding.

A

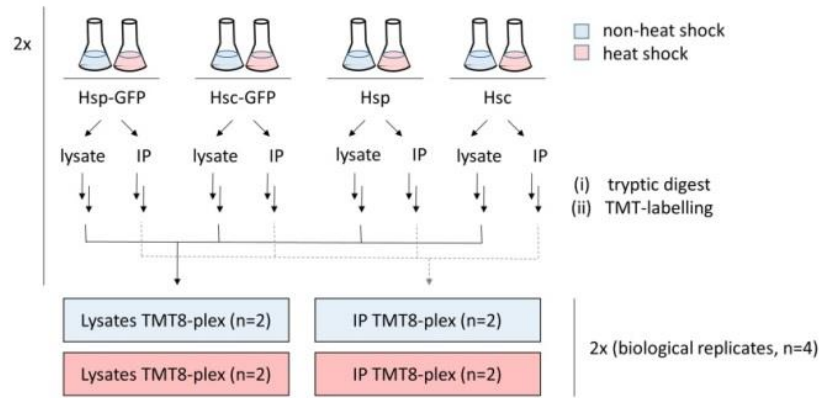

B

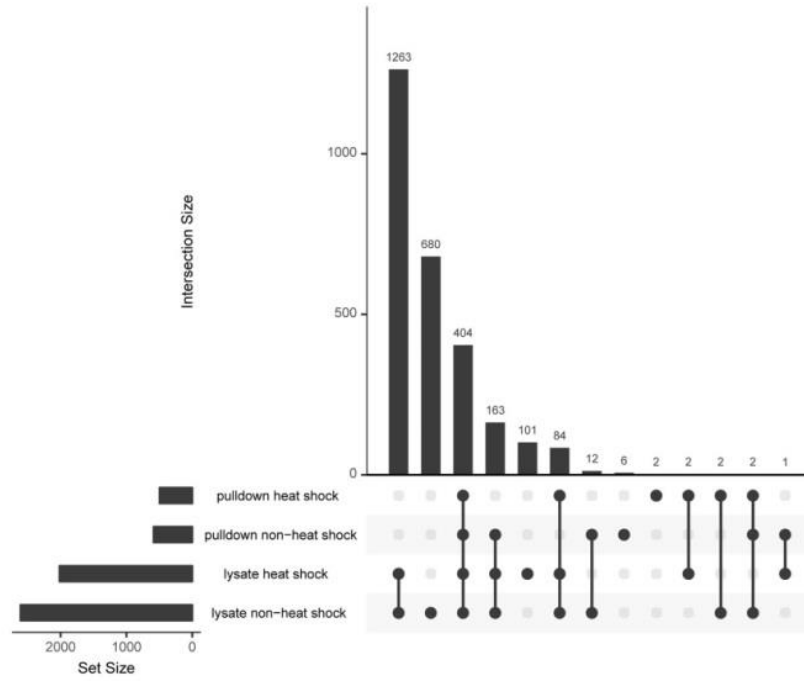

C

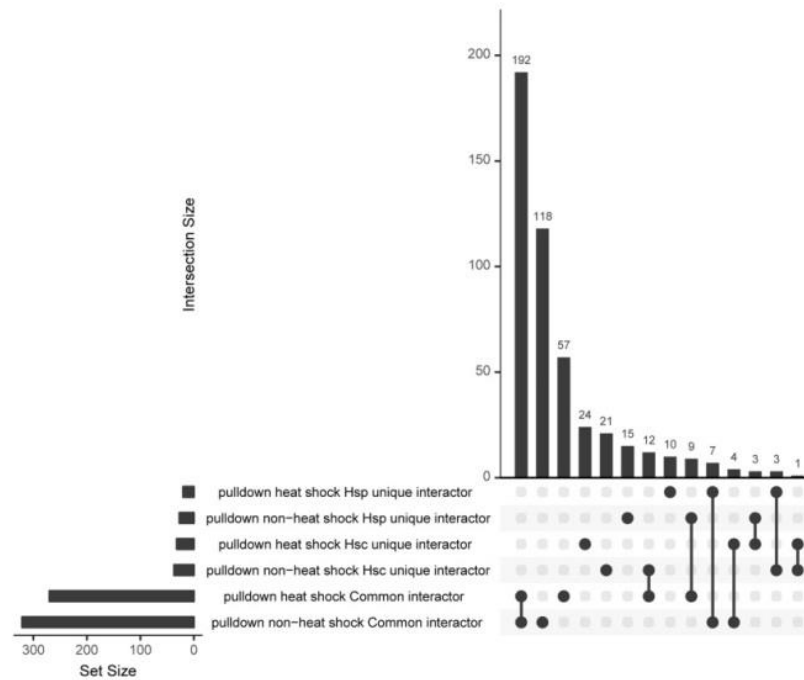

**Supplementary Fig. 6: Interactome analysis of the Hsp90 isoforms.** **A:** Cartoon depicting the experimental flow of the experiment. Duplicates of the pulldowns with the GFP-tagged isoforms and their matched controls (samples with untagged isoforms) were simultaneously analyzed in one MS run. Two runs of each experiment were performed, such that in total quadruplicates of each sample were analyzed. Lysates were analyzed in an identical manner to the pulldown experiments. The total experiment was performed twice (under non-heat shock and heat-shock conditions). **B:** UpSetR plot showing the distribution of identified proteins. **C:** The different interactor categories (common, Hsp unique and Hsc unique), their sizes and their overlaps under non-heat shock conditions are shown with an UpSetR plot.

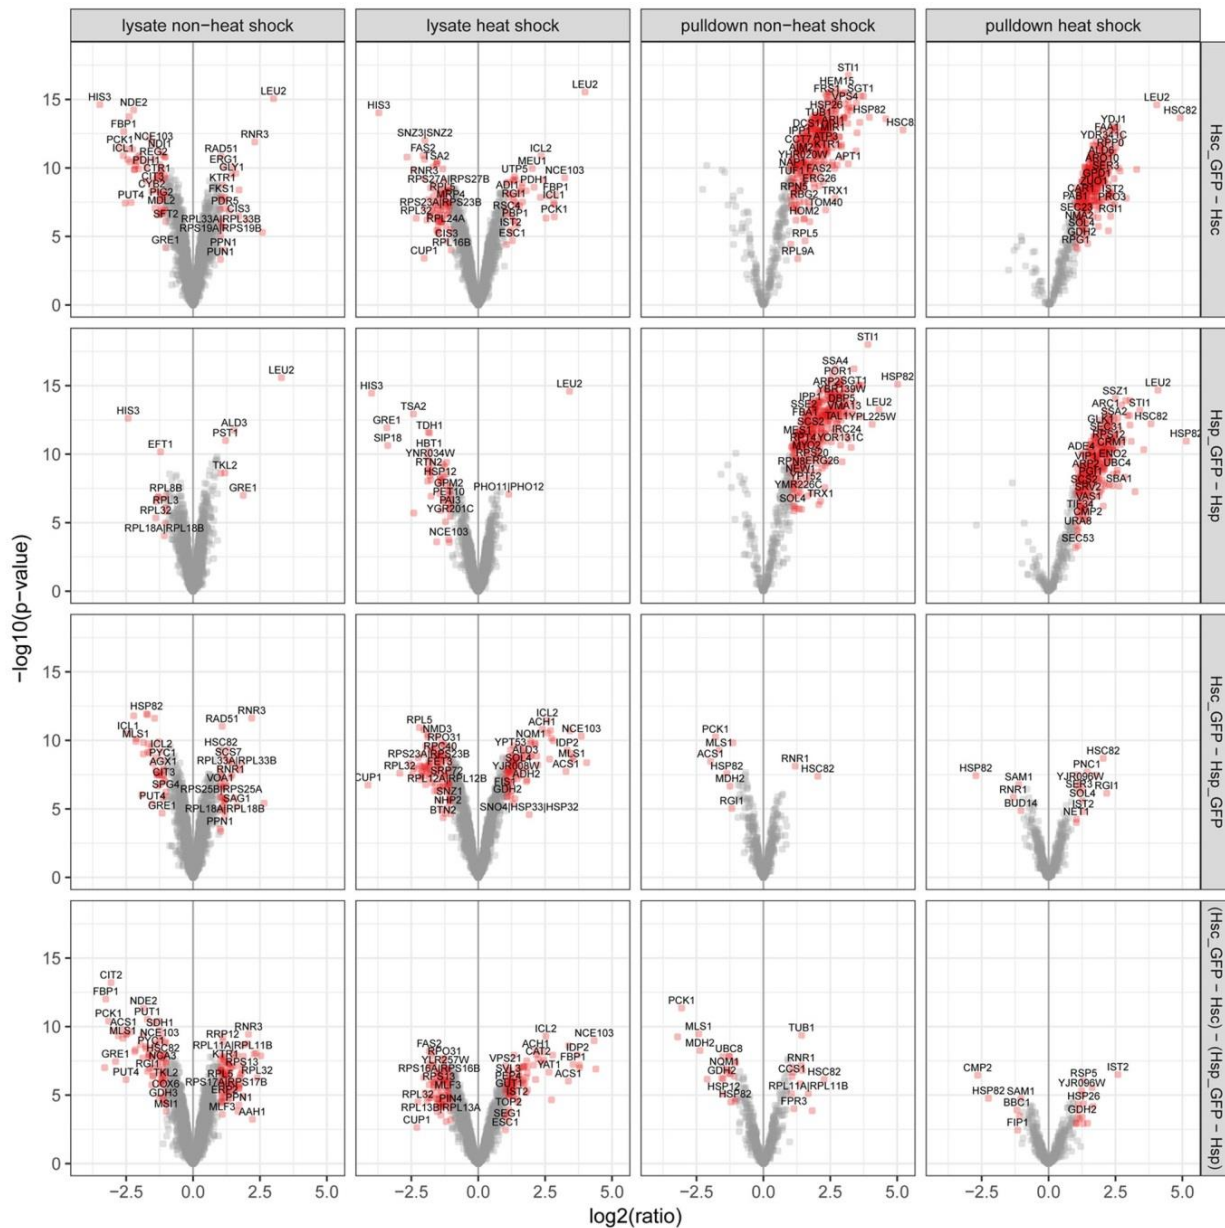

**Supplementary Fig. 7:** Volcano plots. Data for lysates and pulldowns under non-heat shock and heat shock are shown. p-values and fold-changes were calculated with limma (limma uses a moderated t-test).

A

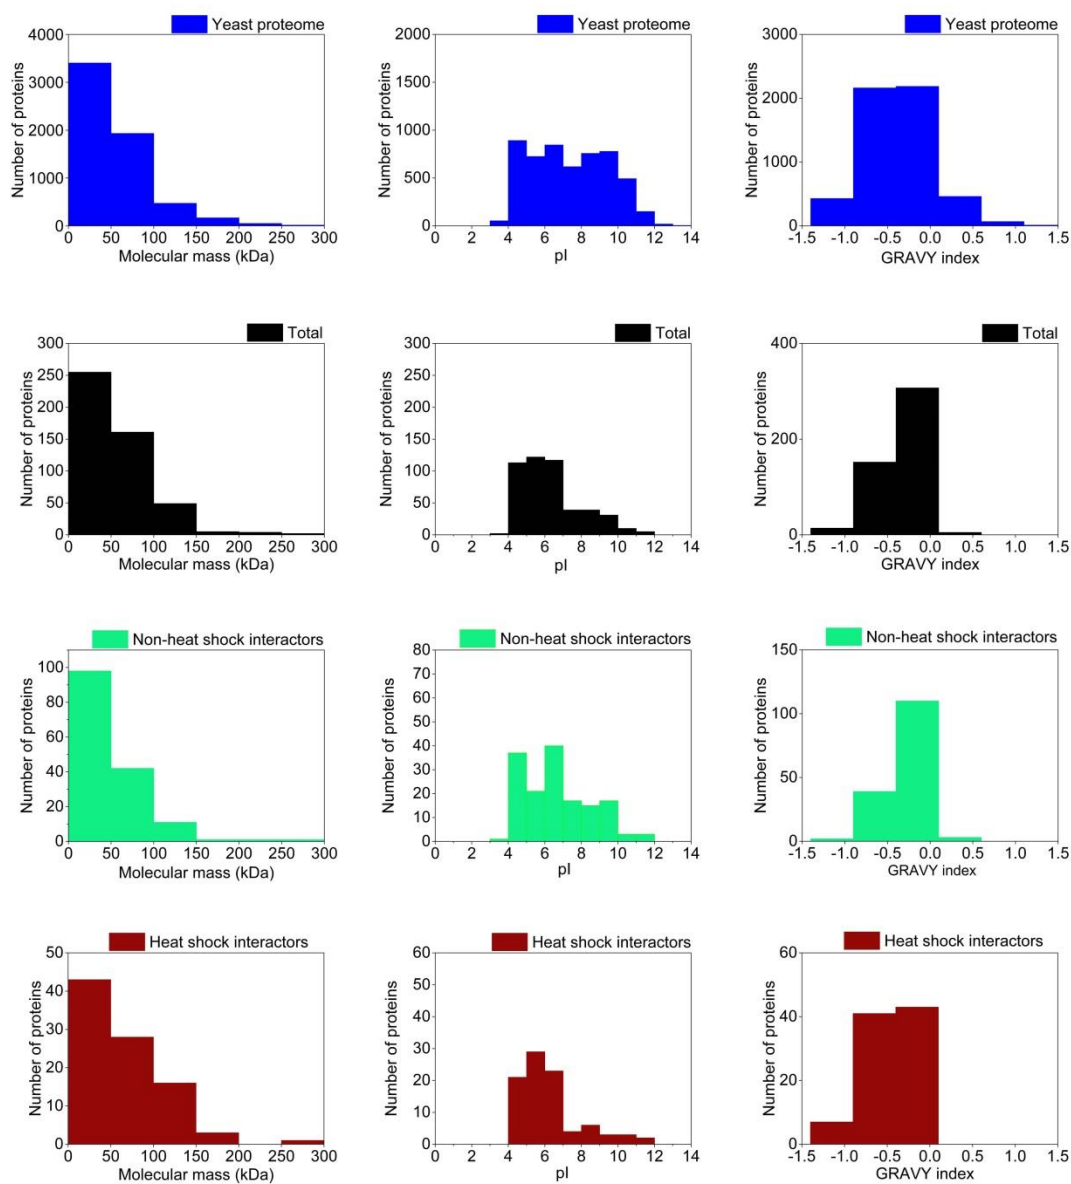

B

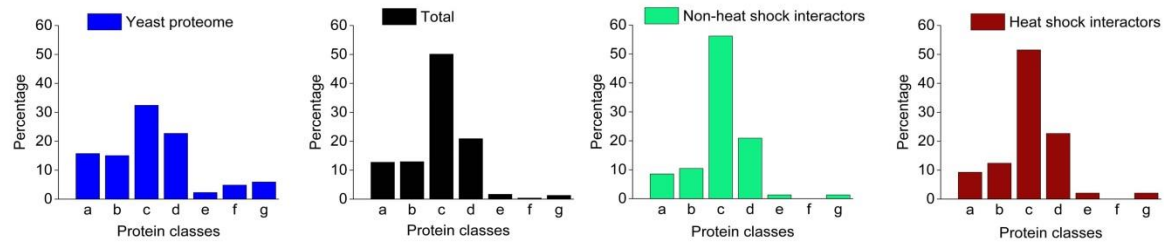

C

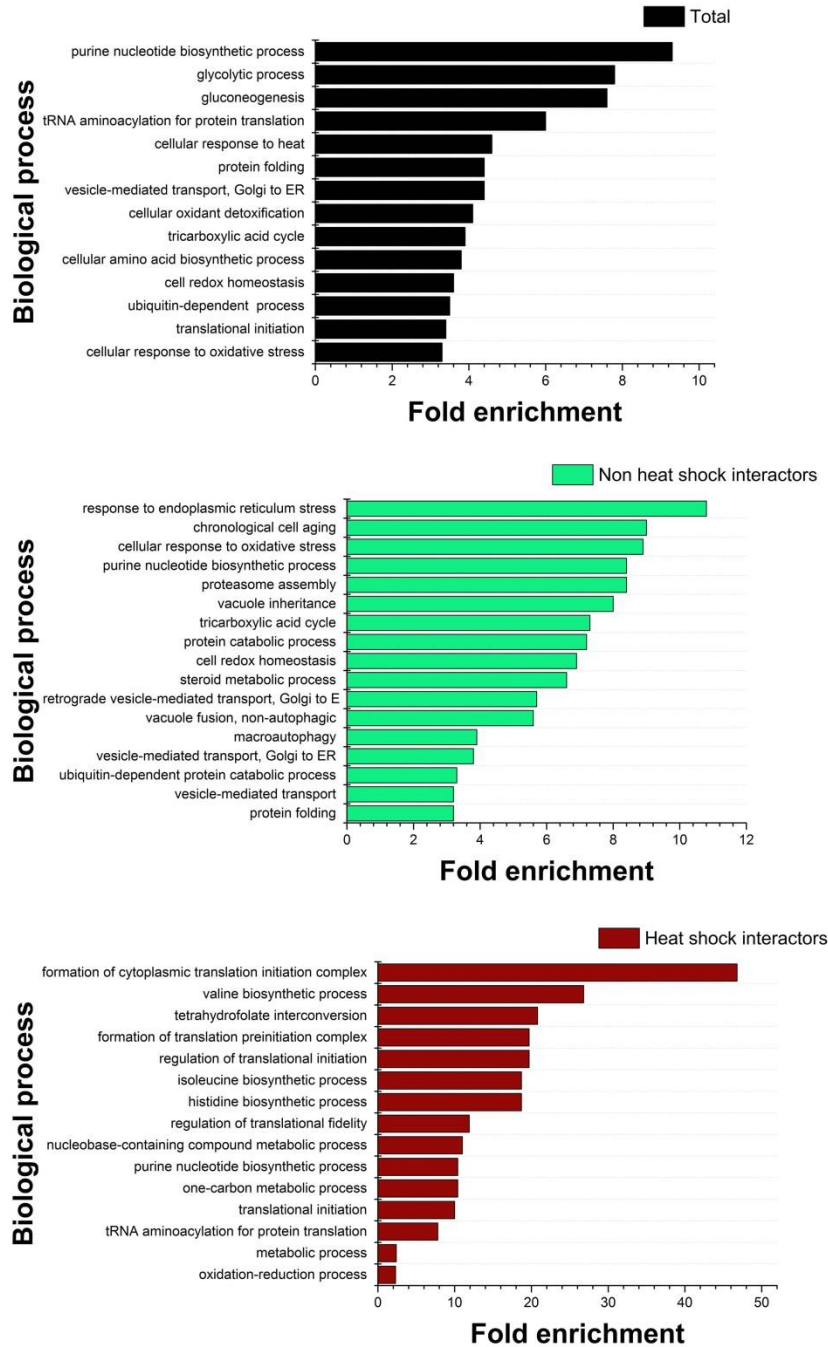

**Supplementary Fig. 8: Biophysical characteristics, protein classes and enriched GO terms.** **A:** Comparison of the molecular mass, the isoelectric point (pI) and the overall hydrophobicity (GRAVY score). The total interactors (black), the non-heat shock interactors (green) and heat shock interactors (red) were compared to the yeast proteome (blue). **B:** Comparison of the SCOPe protein classes. Class distributions were determined using the information from the SCOPe 2.07 database. Colors are the same as in Supplementary Fig. 8A. **C:** Enriched biological processes. GO term analysis was performed using the information from the DAVID bioinformatics resource. Biological processes that are enriched more than 3-fold over the yeast proteome and comprise at least 2 % of all input proteins are shown. An EASE score of 0.1 was used as a threshold. Colors are the same as used in Supplementary Fig. 8A.

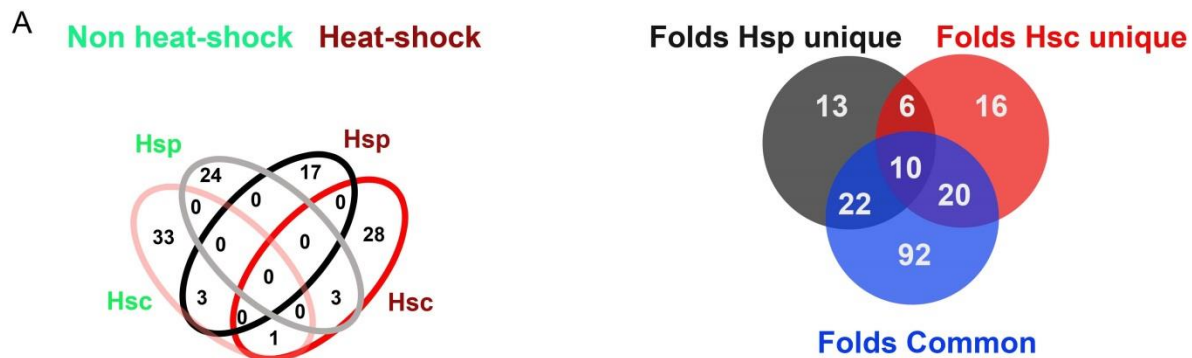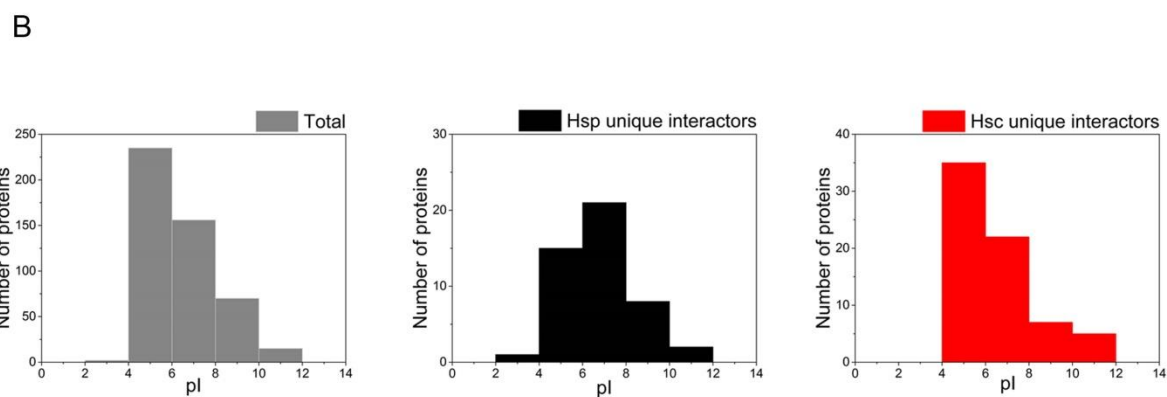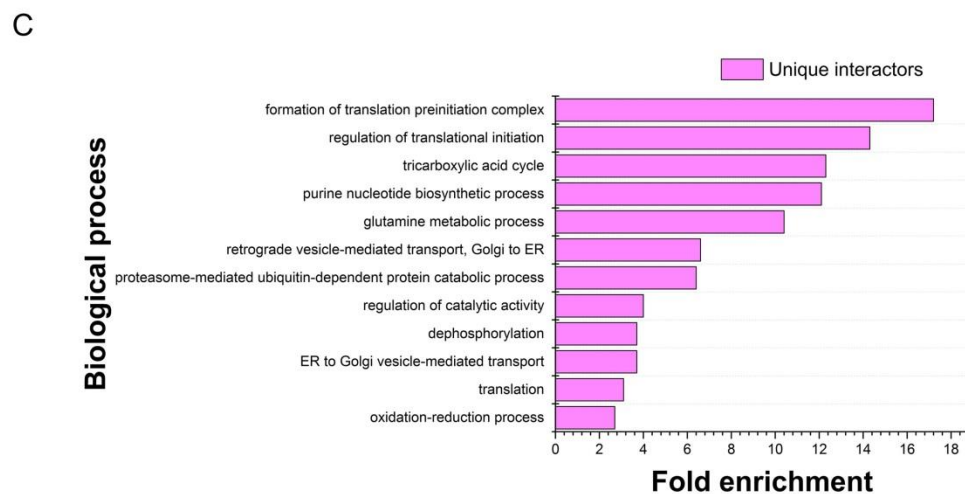

**Supplementary Fig. 9: Unique interactors.** **A: Left panel:** Overlap of the unique interactors under non-heat shock and heat shock conditions (also shown in Fig. 6C) in more detail. Three proteins that were classified as Hsp unique interactors under non-heat shock switch and become Hsc unique interactors under heat shock and vice versa. Only one protein is classified as Hsc unique interactor under non-heat shock and heat shock conditions (Ssp120, Supplementary Data 2). **Right panel:** Overlap of SCOPe folds of the unique interactors and the common interactors. SCOPe folds were assigned using the information from the SCOPe 2.07 database. **B:** Biophysical characteristics of the Hsp unique interactors and Hsc unique interactors compared to the total interactors. **C:** GO direct term analysis (of the biological processes) of all unique interactors. The GO term enrichment analysis was performed with the thresholds described in Supplementary Fig. 8C.

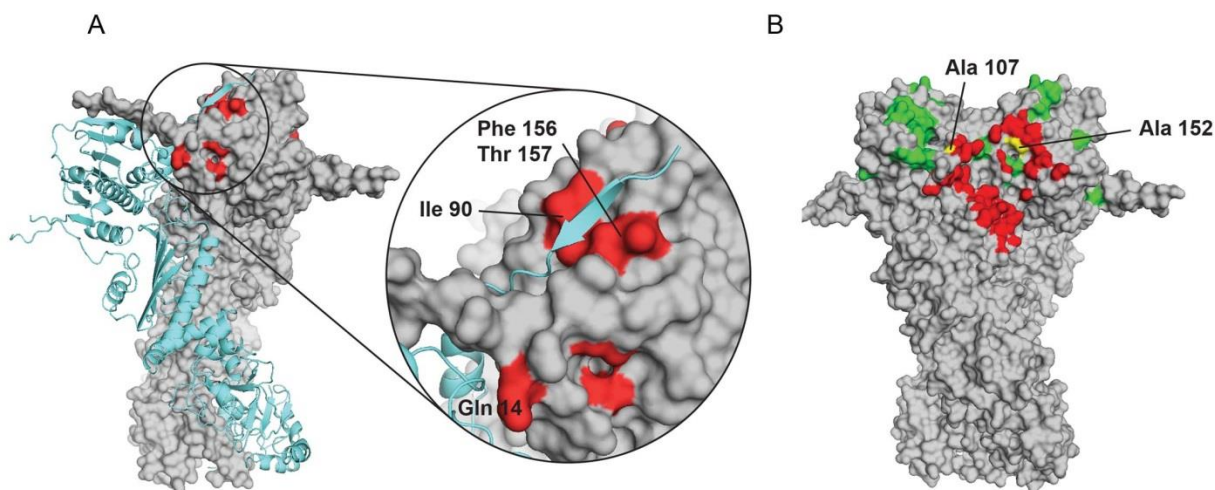

**Supplementary Fig. 10: Cartoons depicting findings from the NMR analysis.** **A:** Surface representation of the X-ray structure of Hsp82 in the closed conformation (PDB id 2CG9<sup>6</sup>) showing residues of the NTD that have a different response upon ATP binding between isoforms (red). One protomer is represented as cartoon for clarity. The inset shows a zoomed view of the interprotomer contacts in NTD. **B:** Surface representation of the same structure showing residues of the NTD that experience high CSP between isoforms or are differently affected upon ATP binding (green) together with the binding surface of the co-chaperone p23/Sba1 (red<sup>6</sup>). As seen, two residues that show high CSPs between isoforms or perturb differently upon ATP binding are located within the p23/Sba1 binding site (overlapping residues are shown in yellow).

| Nr. | Vector          | Insert           | Construct obtained        |
|-----|-----------------|------------------|---------------------------|
| 1   | pET-28 a (+)    | 6His_Sumo        | pET28_6His_Sumo           |
| 2   | pET28_6His_Sumo | Hsp82            | pET28_6His_Sumo_Hsp82     |
| 3   | pET28_6His_Sumo | Hsc82            | pET28_6His_Sumo_Hsc82     |
| 4   | p423 GPD        | Hsp82            | p423 GPD_Hsp82            |
| 5   | p423 GPD        | Hsc82            | p423 GPD_Hsc82            |
| 6   | p423 GPD        | N_Hsp82_MC_Hsc82 | p423 GPD_N_Hsp82_NM_Hsc82 |
| 7   | p423 GPD        | NM_Hsp82_C_Hsc82 | p423 GPD_NM_Hsp82_C_Hsc82 |
| 8   | p423 GPD        | N_Hsc82_MC_Hsp82 | p423 GPD_N_Hsc82_MC_Hsp82 |
| 9   | p423 GPD        | NM_Hsc82_C_Hsp82 | p423 GPD_NM_Hsc82_C_Hsp82 |
| 10  | p425 GPD        | Hsp82_GFP        | P425 GPD_Hsp82_GFP        |
| 11  | P425 GPD        | Hsc82_GFP        | P425 GPD_Hsc82_GFP        |

| Nr. | Fwd primer(s)                                | Reverse primer(s)                                     |
|-----|----------------------------------------------|-------------------------------------------------------|
| 1   | ctggtgccgcgcggcagccatgatggcagccatcaccatcac   | gtcgacggagctcgaattcggatcctgcggccgcagtgatgat           |
| 2   | tcacagagaacagattggtggatccatggctagtgaacttttg  | agtgggtggtggtggtgctcgagctaatactacctcttccatttc         |
| 3   | tcacagagaacagattggtggatccatggctggtgaaacttttg | agtgggtggtggtggtgctcgagtaatacaactcttccatctc           |
| 4   | cgacggatctagaactagtgatccatggctagtgaacttttg   | actaattacatgactcgaggtcgacctaatactacctcttccatttc       |
| 5   | cgacggatctagaactagtgatccatggctggtgaaacttttg  | actaattacatgactcgaggtcgacttaatacaactcttccatctc        |
| 6   | cgacggatctagaactagtgatggctagtgaacttttg       | atggcttagttgttagttcttctatctcttg                       |
|     | aactaaacaaactaagccattatggactag               | actaattacatgactcgaggttaatacaactcttccatctc             |
| 7   | cgacggatctagaactagtgatggctagtgaacttttg       | tccttctctctcttcagctttttctcg                           |
|     | agctgaaagagagaaggagatcaaag                   | actaattacatgactcgaggttaatacaactcttccatctc             |
| 8   | cgacggatctagaactagtgatccatggctggtgaaacttttg  | aaggcttagtctgttcaactcttctaattcttg                     |
|     | gttgaacaagactaagcctttgtggactag               | actaattacatgactcgaggtcgacctaatactacctcttccatttc       |
| 9   | cgacggatctagaactagtgatccatggctggtgaaacttttg  | tccttctctctcttcagctttttctcg                           |
|     | agctgaaagagagaaggagatcaaagaatag              | actaattacatgactcgaggtcgacctaatactacctcttccatttc       |
| 10  | cgacggatctagaactagtgatccgtacgtcgaggtcgac     | cactagccatttattgtacaattcatccataccatggg                |
|     | gtacaataaattggctagtgaacttttg                 | actaattacatgactcgaggtcgacctaatactacctcttccatttc       |
| 11  | cgacggatctagaactagtgatccatggctggtgaaacttttg  | gcagcgtacgttaatacaactcttccatctc                       |
|     | agttgattaacgtacgtcgaggtcgac                  | actaattacatgactcgaggtcgacttattgtacaattcatccataccatggg |

**Supplementary Table 1:** Table of constructs cloned for this work (upper table) and PCR primers used to obtain these constructs (lower table). For the constructs used for protein expression a 6His\_Sumo tag (referred to as 6His\_Sumo) was cloned into a pET28 a (+) plasmid first, which was then used for cloning of the pET28\_6His\_Sumo\_Hsp90 constructs. Primers were designed using the NEBuilder Assembly Tool.

## SUPPLEMENTARY REFERENCES:

- 1 Prodomou, C. *et al.* Identification and structural characterization of the ATP/ADP-binding site in the Hsp90 molecular chaperone. *Cell* **90**, 65-75 (1997).
- 2 Vranken, W. F. *et al.* The CCPN data model for NMR spectroscopy: Development of a software pipeline. *Proteins: Structure, Function, and Bioinformatics* **59**, 687-696, doi:10.1002/prot.20449 (2005).
- 3 Shen, Y., Delaglio, F., Cornilescu, G. & Bax, A. TALOS+: a hybrid method for predicting protein backbone torsion angles from NMR chemical shifts. *Journal of Biomolecular NMR* **44**, 213-223, doi:10.1007/s10858-009-9333-z (2009).
- 4 Roe, S. M. *et al.* Structural Basis for Inhibition of the Hsp90 Molecular Chaperone by the Antitumor Antibiotics Radicicol and Geldanamycin. *Journal of Medicinal Chemistry* **42**, 260-266, doi:10.1021/jm980403y (1999).
- 5 Prodomou, C. *et al.* Identification and Structural Characterization of the ATP/ADP-Binding Site in the Hsp90 Molecular Chaperone. *Cell* **90**, 65-75, doi:10.1016/S0092-8674(00)80314-1.
- 6 Ali, M. M. *et al.* Crystal structure of an Hsp90-nucleotide-p23/Sba1 closed chaperone complex. *Nature* **440**, 1013-1017, doi:10.1038/nature04716 (2006).
